# Supplementary material for: Hop (Humulus lupulus L.) extract reverts glycaemic imbalance and cognitive impairment in an animal model of obesity
Source: Royal Society of Chemistry journal article supplement (doi:10.1039/d4fo02062f), 2024-01-01

### Supporting Information

Markers for brain degeneration GSK3 $\beta$  and p-IRS1 protein expressions

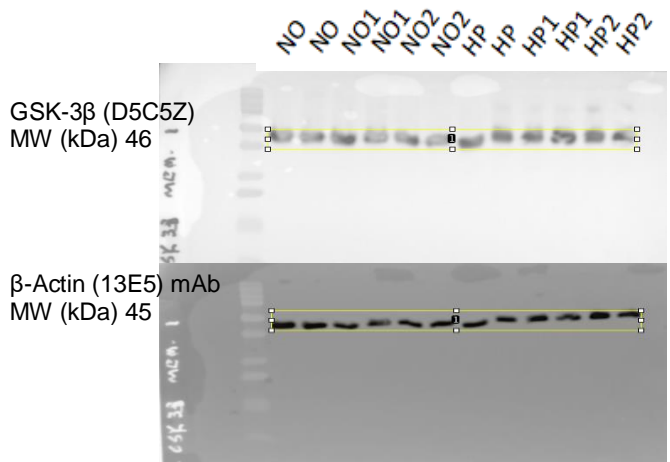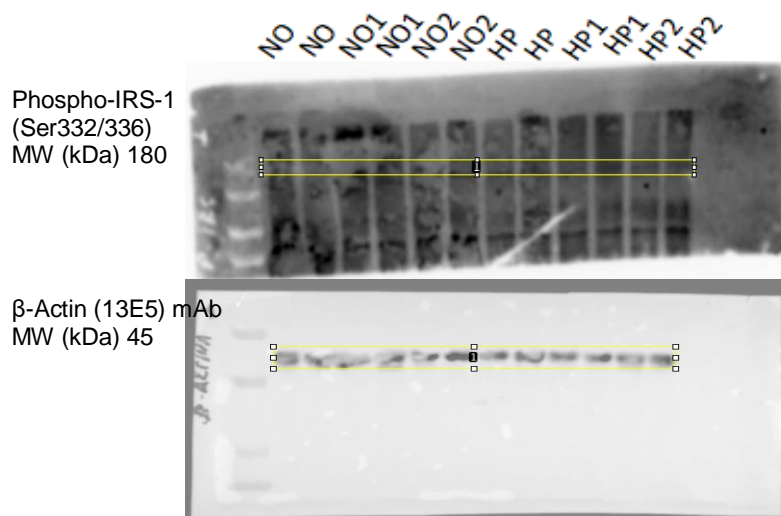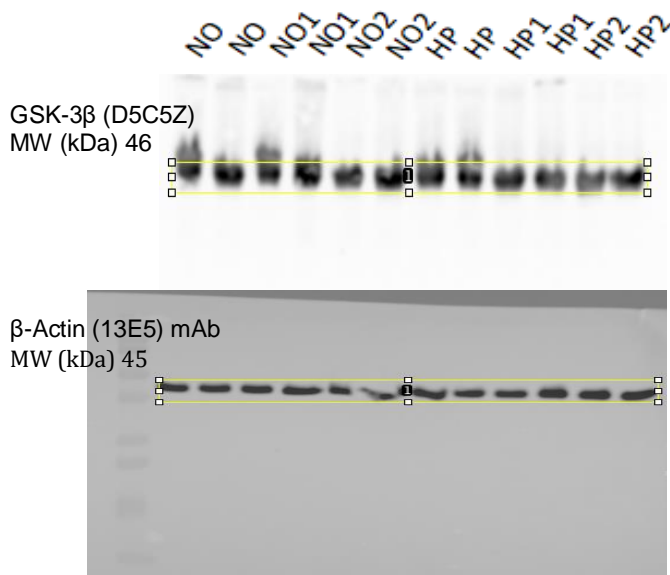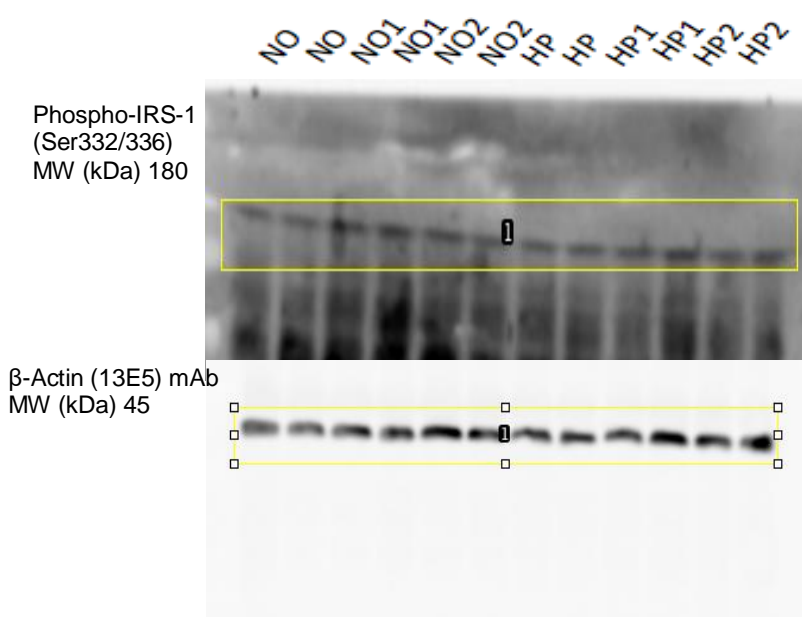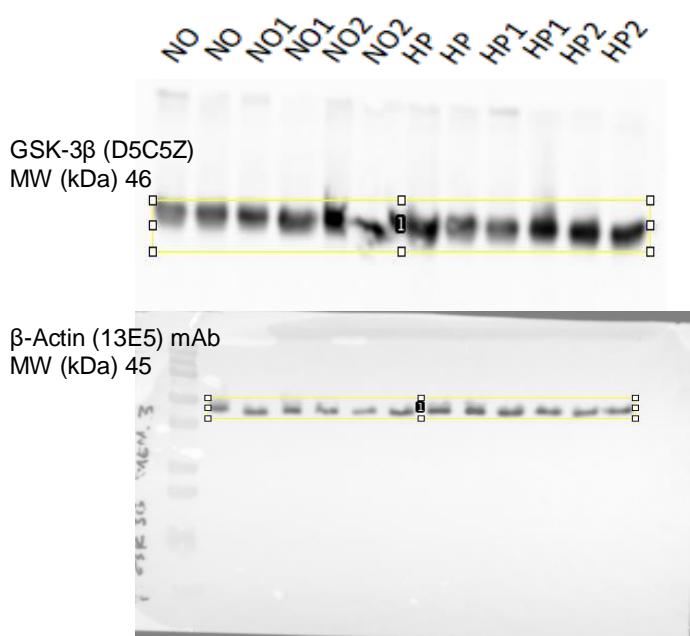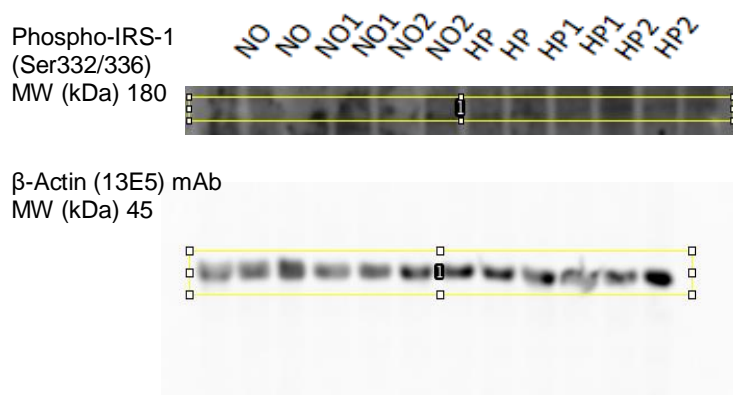

Supplement: d4fo02062f1.pdf [file d4fo02062f1.pdf]
